# Supplementary material
Source: PubMed Central journal article supplement (PMC4373750)
Supplement: supp_M057232_jlr.M057232-1.pdf [file supp_M057232_jlr.M057232-1.pdf]

Supplemental data

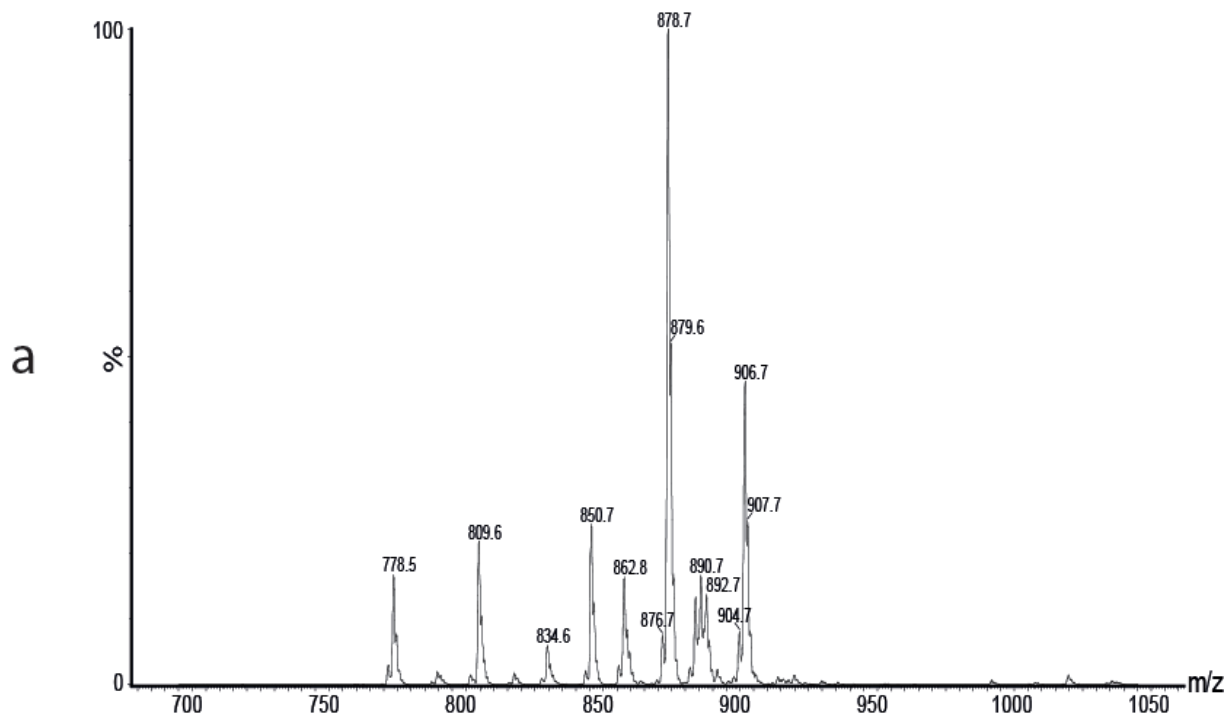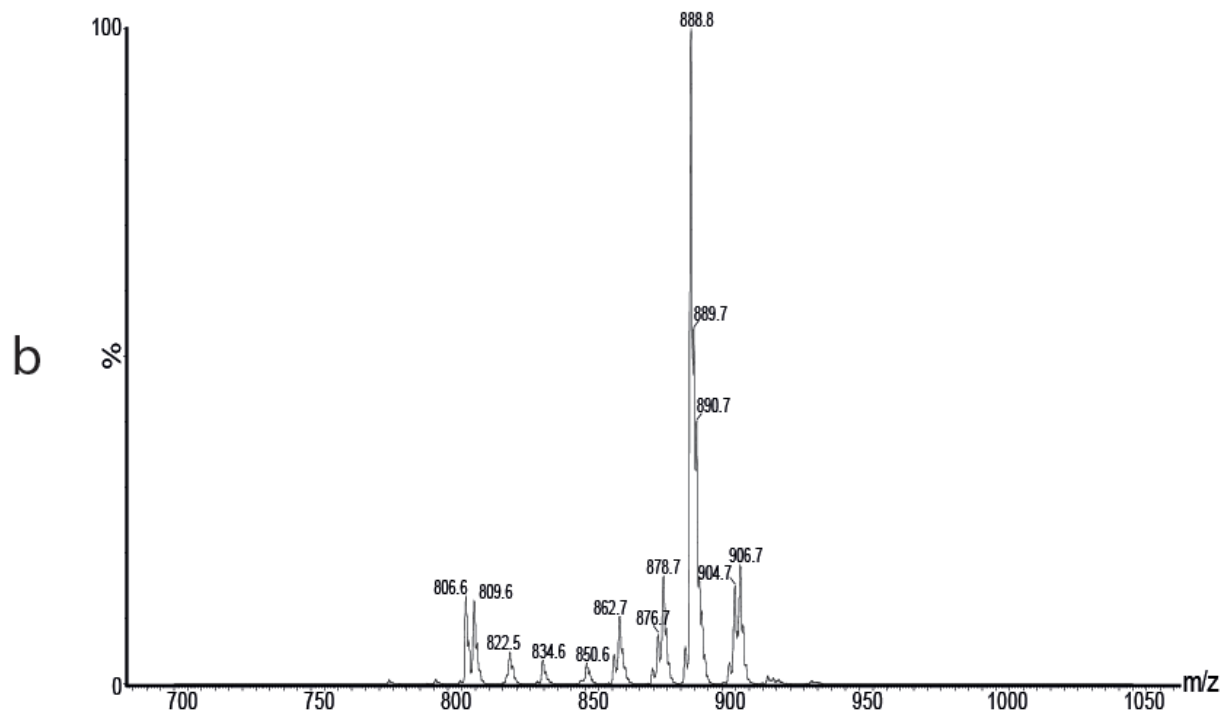

Figure Legends:

Figure 1. **Precursor ion scan of sulfatides in mouse kidney and brain homogenates.** The precursors of  $m/z$  96.9 are shown for mouse kidney (a) and brain (b), note that 809.6 is the internal standard N-C18:0-D3-sulfatide.

## Tables:

**Table 1.** Instrument parameters sulfatides

|                         |                 |
|-------------------------|-----------------|
| Capillary voltage       | 4.0 kV          |
| Cone voltage            | 80 V            |
| Source temperature      | 140 °C          |
| Desolvation temperature | 450 °C          |
| Cone gas                | 50 L/h          |
| Desolvation gas         | 950 L/h         |
| Collision gas           | 0.30 mL/min     |
| Collision voltage       | 70 V            |
| Type                    | MRM             |
| Ion mode                | ES <sup>-</sup> |
| Dwell time              | 0.05 s          |
| Interchannel delay      | 0.005 s         |
| Interscan delay         | 0.005 s         |

**Table 2.** Instrument parameters lysosulfatides.

---

|                         |                 |
|-------------------------|-----------------|
| Capillary voltage       | 4.0 kV          |
| Cone voltage            | 80 V            |
| Source temperature      | 140 ° C         |
| Desolvation temperature | 450 °C          |
| Cone gas                | 50 L/h          |
| Desolvation gas         | 950 L/h         |
| Collision gas           | 0.30 mL/ min    |
| Collision voltage       | 55 V            |
| Type                    | MRM             |
| Ion mode                | ES <sup>-</sup> |
| Dwell time              | 0.100 s         |
| Interchannel delay      | 0.005 s         |
| Interscan delay         | 0.005 s         |

---

**Table 3.** Transitions and retention times measured for sulfatides and

| Mol. Species              | Transition       | RT (min.): |
|---------------------------|------------------|------------|
| C16:0-sulfatide           | m/z 778.7 > 96.9 | 3.72       |
| C16:0-OH-sulfatide        | m/z 794.7 > 96.9 | 3.66       |
| C18:0-sulfatide           | m/z 806.7 > 96.9 | 3.93       |
| N-C18:0-D3-sulfatide (IS) | m/z 809.9 > 96.9 | 3.92       |
| C18:0-OH-sulfatide        | m/z 822.7 > 96.9 | 3.87       |
| C20:0-sulfatide           | m/z 834.7 > 96.9 | 4.26       |
| C20:0-OH-sulfatide        | m/z 850.7 > 96.9 | 4.20       |
| C22:1-sulfatide           | m/z 860.7 > 96.9 | 4.17       |
| C22:0-sulfatide           | m/z 862.7 > 96.9 | 4.63       |
| C22:0-OH-sulfatide        | m/z 878.7 > 96.9 | 4.56       |
| C24:0-sulfatide           | m/z 890.9 > 96.9 | 5.16       |
| C24:1-sulfatide           | m/z 888.7 > 96.9 | 4.64       |
| C24:1-OH-sulfatide        | m/z 904.7 > 96.9 | 4.55       |
| C24:0-OH-sulfatide        | m/z 906.7 > 96.9 | 5.04       |
| C26:1-sulfatide           | m/z 916.7 > 96.9 | 5.16       |
| Lysosulfatide             | m/z 540.4 > 96.9 | 3.29       |
| N-acetylsulfatide (IS)    | m/z 582.5 > 96.9 | 3.28       |
| Lyso-ene-sulfatide        | m/z 538.4 > 96.9 | 3.10       |

**Table 4.**

| Mol. Species    | Plasma† | Plasma‡ |
|-----------------|---------|---------|
| C16:0           | 5307    | 2925    |
| C16:0-OH        | 9929    | 6193    |
| C18:0           | 2611    | 1382    |
| N-C18:0-D3 (IS) | 22952   | 7035    |
| C20:0           | 631     | 129     |
| C20:0-OH        | 359     | 101     |
| C22:0           | 1600    | 297     |
| C22:0-OH        | 1166    | 294     |
| C24:1           | 13695   | 2737    |
| C24:0           | 2845    | 912     |
| C24:1-OH        | 3005    | 566     |
| C24:0-OH        | 1535    | 629     |
| C26:1           | 960     | 284     |

**Table4 Legend:**

† extraction method developed by us, Liquid / Liquid extraction followed by solid phase extraction; ‡ Liquid / Liquid extraction only.
